## **Same-sex sexual behavior and selection for indiscriminate mating**

Brian A Lerch\* and Maria R Servedio

Department of Biology. University of North Carolina at Chapel Hill.

250 E Franklin St. Chapel Hill, NC 27514.

\*blerch@live.unc.edu

1           **The widespread presence of same-sex sexual behavior (SSB) has long been thought**  
2 **to pose an evolutionary conundrum<sup>1-3</sup>, as participants in SSB suffer the cost of failing to**  
3 **reproduce after expending the time and energy to find a mate. The potential for SSB to**  
4 **occur as part of an optimal strategy has received almost no attention, although**  
5 **indiscriminate sexual behavior may be the ancestral mode of sexual reproduction<sup>4</sup>. Here,**  
6 **we build a simple model of sexual reproduction and create a theoretical framework for the**  
7 **evolution of indiscriminate sexual behavior. We provide strong support for the hypothesis**  
8 **that SSB is likely maintained by selection for indiscriminate sexual behavior, by showing**  
9 **that indiscriminate mating is the optimal strategy under a wide range of conditions.**  
10 **Further, our model suggests that the conditions that most strongly favor indiscriminate**  
11 **mating were likely present at the origin of sexual behavior. These findings have**  
12 **implications not only for the evolutionary origins of SSB, but also for the evolution of**  
13 **discriminate sexual behavior across the animal kingdom.**

14           Empirical observations of same-sex sexual behavior (SSB; i.e., any attempted sexual  
15 activity between two or more members of the same sex) in animals are widespread, with  
16 evidence of SSB in mammals<sup>5-9</sup>, birds<sup>10-14</sup>, arthropods<sup>15-19</sup>, mollusks<sup>20-22</sup>, echinoderms<sup>23-25</sup>, and  
17 other animals<sup>26-30</sup>. Since SSB is traditionally thought to be deleterious, as same-sex matings  
18 require energy expenditure but cannot produce offspring, there has been much interest in  
19 understanding its origin and maintenance<sup>1-5</sup>. Despite this, there exists no strong theoretical  
20 foundation for understanding SSB (but see <sup>31,32</sup>), resulting in a wide range of untested verbal  
21 arguments in the literature<sup>1-5</sup>.

22           Recently, Monk et al.<sup>4</sup> challenged the longstanding perspective of SSB as a derived trait,  
23 arguing that rather than trying to understand its presence, a more salient question would be to

24 understand its absence. They hypothesize that indiscriminate sexual behavior (i.e., mating  
25 without determining the sex of one's partner) is the ancestral condition, realizing that  
26 discriminate sexual behavior (i.e., directing sexual behavior at members of the opposite sex)  
27 must evolve through mechanisms controlling sexual signaling and mate choosiness. Of course,  
28 the existence of indiscriminate mating as the ancestral condition does not explain its current  
29 prevalence<sup>33</sup>. While in some cases (e.g., broadcast spawning and wind pollination) indiscriminate  
30 mating predominates as a result of little potential benefit to (or opportunity for) sexual  
31 discrimination, it is oftentimes unclear why indiscriminate mating persists.

32 Building on the perspective of Monk et al.<sup>4</sup>, we argue that selection may actually favor  
33 indiscriminate sexual behavior (or prevent the evolution of sexual discrimination) under a wide  
34 range of conditions observed in nature. We create a theoretical framework for understanding the  
35 conditions that favor indiscriminate sexual behavior and provide a test of whether SSB is likely  
36 to result from selection for indiscriminate sexual behavior. We start with a simple optimization  
37 model of sexual reproduction, then support this approach with a population genetic model that  
38 explicitly tracks evolutionary dynamics. We find that indiscriminate mating is the optimal  
39 strategy for many parameter combinations and produce testable predictions about the conditions  
40 that favor SSB resulting from indiscriminate mating.

## 41 **Optimization Model**

42 We present the optimization model in full in the Supplementary Methods and provide a  
43 basic summary of its features here. Our approach explores one of many<sup>34</sup> potential hypotheses  
44 for SSB (that it results from indiscriminate mating) without considering the evolution of same-  
45 sex preferences that have evolved in some vertebrates and may result from complex social or  
46 genetic interactions (see Table 2 in Bailey and Zuk<sup>1</sup>). As a result, and because our model does

47 not make assumptions consistent with sexual behavior in humans, this study should not be  
48 considered in relation to human sexuality. We assume that a population consists of two sexes  
49 (the searching sex and the targeted sex), where a proportion  $\sigma$  is of the targeted sex. We make no  
50 assumptions about the identity of the sexes and use the terms searching and targeted liberally.  
51 For example, if our model were applied to an insect in which males seek females to display to,  
52 males would be the searching sex and the females would be the targeted sex.

53 We assume that reproduction occurs in discrete bouts (corresponding to generations)  
54 where each member of the searching sex has only one opportunity to mate per bout (an  
55 assumption that biases against indiscriminate mating since SSB cannot be corrected for within  
56 one reproductive bout). We assume that an individual of the searching sex finds another  
57 individual of either sex with which to attempt to mate with probability  $f$ . The evolutionarily  
58 labile parameter of our model  $a$  controls whether the searching sex attempts to mate  
59 discriminately. In particular,  $a$  is the proportion of bouts in which a member of the searching sex  
60 attempts to sexually discriminate. Of course, members of the searching sex can only mate  
61 discriminately if they identify some signal (or cue) that an individual is of the opposite sex. We  
62 define  $s$  as the proportion of bouts in which a member of the targeted sex provides a signal of  
63 their sexual identity. Then, as shown in the Supplementary Methods, given that a member of the  
64 searching sex finds a mate, it will be of the opposite (targeted) sex with probability  $\sigma + (1 - \sigma)as$ .  
65 Thus, if members of the targeted sex always signal ( $s = 1$ ) and members of the searching sex  
66 always attempt to discriminate ( $a = 1$ ), a member of the searching sex is guaranteed to find a  
67 member of the targeted sex. Furthermore, without any signal from the targeted sex ( $s = 0$ ) or any  
68 attempt to discriminate from the searching sex ( $a = 0$ ), the probability of finding a mate of the

69 opposite sex is simply the proportion of the population of that sex  $\sigma$ . We discuss the  
70 interpretation of  $a$  and  $s$  further in the Supplementary Methods.

71 Even upon finding a mate of the opposite sex the searching sex may be rejected by their  
72 potential mate (with probability  $r$ ), in which case they do not reproduce in the reproductive bout.  
73 We assume that matings suffer a fecundity cost  $p$  associated with the sexual signal. Individuals  
74 from the searching sex die between reproductive bouts with probability  $d$  in the absence of  
75 sexual discrimination. They also carry an additional survival cost  $c$  when they attempt sexual  
76 discrimination (a search cost), such that a member of the searching sex will survive to the next  
77 reproductive bout with probability  $1 - (d + ac)$ .

## 78 **Analysis and Results**

79 The model above results in a wide range of parameter space in which indiscriminate  
80 mating is an optimal strategy. Specifically, one can derive from this model the expected lifetime  
81 reproductive success of a member of the searching sex,  $R_0$ . Differentiating  $R_0$  with respect to  $a$   
82 gives the fitness gradient  $dR_0/da$  (see Supplementary Methods). At a given amount of sexual  
83 discrimination  $a$ , the sign of the fitness gradient gives the expected direction of evolution. Values  
84 of  $a$  for which the fitness gradient is 0 are potential evolutionary optima. In analyzing the  
85 optimal amount of sexual discrimination, one can determine under what conditions, if any,  
86 individuals should attempt to mate indiscriminately. If the optimal strategy is indiscriminate  
87 mating, then SSB is expected to be frequent.

88 Of particular interest is whether indiscriminate mating ( $a = 0$ ) is ever an optimal strategy.  
89 We show in the Supplementary Methods that the fitness gradient at  $a = 0$  will be negative (and  
90 thus sexual discrimination should never evolve) whenever

91 
$$c > (1 - \sigma)(1 - d)ds/\sigma. \tag{1}$$

92 Given a 1:1 sex ratio ( $\sigma = 0.5$ ), equation (1) simplifies to  $c > (1 - d)ds$ . Equation (1) shows that  
93 even under restrictive conditions in which the targeted sex always provides a sexual signal ( $s =$   
94 1), the optimal strategy may be to never attempt sexual discrimination. Without sexual signaling  
95 ( $s = 0$ ), if there is any cost to attempting to sexually discriminate, sexual discrimination is not  
96 expected to evolve. Although this is obvious given the formulation of the model, it formalizes  
97 the important point that the origin of sex and the origin of providing signals of one's sex are not  
98 the same. Logically, such cues likely evolved after the origin of sexual reproduction<sup>4</sup>, so our  
99 model suggests selection for sexual discrimination was unlikely to follow immediately upon the  
100 origin of sex, strengthening the hypothesis that indiscriminate sexual behavior is likely  
101 ancestral<sup>4</sup>.

102 Similarly, the conditions for maximum attempted discrimination  $a = 1$  to be the best  
103 strategy are derived in the Supplementary Methods and shown in Table 1. If neither condition is  
104 met, then an intermediate level of sexual discrimination will evolve (an outcome that occurs in a  
105 small but non-trivial portion of the parameter space).

106 A high cost to sexual discrimination  $c$  and poor signaling by the targeted sex  $s$  promotes  
107 indiscriminate mating as the optimal strategy (equation (1) and Fig. 1). Sexual discrimination is  
108 most likely to evolve when the sex ratio is biased in favor of the searching sex (equation (1)).  
109 When the majority of the population is of the targeted sex ( $1 > \sigma \gg 0.5$ ), individuals are more  
110 likely to find a member of the opposite sex with which to mate by chance, so attempted sexual  
111 discrimination is a worse strategy than when the targeted sex is rare.

112            Interestingly, an intermediate death rate  $d$  favors the evolution of sexual discrimination  
113 (Fig. 1). When death is rare (small  $d$ ), members of the searching sex are expected to have many  
114 reproductive opportunities in their lifetime. Under these conditions, the best strategy is to live as  
115 long as possible by not attempting to sexually discriminate. The cost of SSB in this case is low  
116 because one failed mating due to SSB will likely be made up for by chance later in life. On the  
117 other hand, when  $d$  is high, members of the searching sex are unlikely to ever mate. In this case,  
118 they cannot afford to pay any additional cost and their optimal strategy is to mate  
119 indiscriminately and rely on luck. Of course, indiscriminate mating will result in SSB being  
120 common (Fig. 1, bottom row).

121            Although they do not affect the optimal level of discrimination, increasing the cost of  
122 sexual signals  $p$  and the probability of mate rejection  $r$  and decreasing the probability of finding  
123 any individual  $f$  cause the selection gradient to approach 0 (i.e., weaker selection; Movie S1 and  
124 Table 2 show the effect of each parameter). If indiscriminate mating is ancestral, these conditions  
125 are more conducive to the transient maintenance of indiscriminate sexual behavior by reducing  
126 the efficacy of selection and making the stochastic loss of discriminate mating more likely. Thus,  
127 discriminate mating is less likely to evolve in sparse populations (low  $f$ ) or when the targeted sex  
128 is choosy or the searching sex competitive (high  $r$ ).

129            We test the generality of our results by modifying our assumptions to allow same-sex  
130 matings to carry an additional cost (Supplementary Appendix S1), to include mortality from  
131 different sources acting multiplicatively (Supplementary Appendix S2), to assume the cost to  
132 sexual discrimination is due to fecundity as opposed to survival (Supplementary Appendix S3),  
133 and to assume a semelparous life history (Supplementary Appendix S4). We show the conditions  
134 for no or complete sexual discrimination to evolve given these assumptions in Table 1. We

135 consider the existence of additional costs to SSB as an extension since while such costs have  
136 been found<sup>35</sup> (and are often suggested<sup>3</sup>), other studies fail to support that such costs exist<sup>36,37</sup>.  
137 Our primary results are robust to all of these changes, with each version of the model predicting  
138 an appreciable region of parameter space for which indiscriminate mating is the optimal strategy.  
139 Of course, assuming that SSB carries explicit costs (in addition to the opportunity costs implicit  
140 in the above analysis) results in more restrictive conditions for sexual discrimination to evolve,  
141 although small costs to SSB have only small impacts on the model outcomes. The only  
142 qualitative differences between the model versions occur at high death rates  $d$  when mortality is  
143 multiplicative, high signaling costs  $p$  when discrimination cost is to fecundity, or low death rates  
144  $d$  when the searching sex is semelparous. Qualitative outcomes of the models are compared in  
145 Table 3.

## 146 **Dynamical Model**

147 Although our optimization model is analytically tractable and clarifies costs and benefits,  
148 lifetime reproductive success is not necessarily maximized by selection<sup>38</sup>. As such, we also build  
149 a single-locus population genetic model with haploid genetics and overlapping generations that  
150 makes similar assumptions to the approach above. Importantly, the population genetic model  
151 extends the optimization approach by incorporating frequency dependence and allowing the sex  
152 ratio to change naturally from feedbacks with mortality due to discrimination costs. Since  $p$ ,  $r$ ,  
153 and  $f$  play no role in this framework, they are ignored. We still assume a background mortality of  
154  $d$  afflicts both sexes and a survival cost of attempted discrimination of  $ac$  is suffered only by the  
155 searching sex. The probability of finding a mate of the opposite sex is still  $\sigma + (1 - \sigma)as$ , but now  
156 the sex ratio  $\sigma$  emerges from the model. We use successive invasions to determine the



157 evolutionarily stable values of attempted sexual discrimination  $a$ . Although not analytically  
158 tractable, this model makes no assumptions *a priori* about the quantity that selection maximizes.

159       The results from this population genetic model align strikingly well with the optimization  
160 approach, with the range of conditions under which indiscriminate mating is uninvadible being  
161 practically identical between approaches (Fig. S1). A stable polymorphism identified by mutual  
162 invasibility only occurs in about 2% of 10,000 randomly generated parameter combinations and  
163 is especially common at low or high death rates  $d$  and strong sexual signals  $s$ . This model shows  
164 that not attempting to discern the sex of potential mates can be a convergent stable evolutionary  
165 optimum.

## 166 **Implications**

167       SSB is often considered a result of mistaken identity<sup>39-41</sup>, as is suggested to account for  
168 about 80% of reported cases in arthropods<sup>3</sup>. Our model provides an evolutionary perspective on  
169 this mistaken identity hypothesis, suggesting that poor sex identification could actually occur as  
170 an optimal strategy. This evokes hypotheses that SSB may result from a mating strategy of  
171 attempting copulation with any encountered conspecific due to low probability of encounter<sup>21</sup> or  
172 low costs to SSB<sup>22,30</sup>. The costs of missing an opportunity to mate and of attempting SSB have  
173 been discussed<sup>42-44</sup> in the context of the acceptance cost threshold hypothesis<sup>45</sup>—a general theory  
174 suggesting that erroneous associations (e.g. between mates or cooperative partners) become more  
175 likely with poor discrimination ability and low costs to mistaken associations. We provide a  
176 formal application of this hypothesis to SSB and show which conditions favor indiscriminate  
177 mating.

178           It was argued by Parker<sup>46</sup> that six evolutionary transitions (the “sexual cascade”) drove  
179 unicellular asexual organisms to become behaviorally-complex, sexual organisms. One such  
180 transition is the evolution of the movement of males toward females before sperm release during  
181 external fertilization (an example of sexual discrimination referred to as “female targeting”<sup>46</sup>).  
182 To our knowledge, Parker’s model<sup>46</sup> is the only study addressing whether sexual discrimination  
183 evolves. Direct comparison between Parker’s model and our model is difficult, but we seem to  
184 find more restrictive conditions for the evolution of sexual discrimination, which can be  
185 attributed to 1) imperfect signaling (our  $s$ ) of the targeted sex (as is likely at the origin of sexual  
186 reproduction<sup>4</sup>) and 2) a search cost<sup>47,48</sup> (our  $c$ ) for attempting to sexually discriminate (instead of  
187 a tradeoff with gonad expenditure<sup>46</sup>). These models are complementary; our model applies to  
188 cases not considered by Parker<sup>46</sup> such as SSB in species with internal fertilization (e.g. insects<sup>3</sup>)  
189 or species with limits on their ability to find and identify mates (e.g. those with search costs, poor  
190 signals of sexual identity, and deep-sea species<sup>21,23,24</sup>).

191           It is interesting to consider how the predictions of the model relate to the conditions  
192 expected at the origin of sexual behavior. Echinoderms are likely good proxies for such  
193 animals<sup>4,46</sup>, supported by their position as an outgroup to chordates (where most complexity in  
194 sexual behaviors arise). Consistent with the model’s predictions for species that mate  
195 indiscriminately, long-lived adults are common in echinoderms<sup>49,50</sup>. Additionally, it is reasonable  
196 to expect that cues to determine sex in echinoderms are relatively limited both because visual  
197 cues cannot be relied upon and there exists little evidence in this taxon for chemical cues for sex-  
198 specific recognition from a distance<sup>51,52</sup>. Indeed, multiple studies suggest some echinoderm  
199 species form mating pairs without consideration for sex<sup>23,24,53</sup>. This suggests that if

200 indiscriminate sexual behavior is the ancestral condition<sup>4</sup>, sexual discrimination was unlikely to  
201 have evolved readily.

202         This model relates to previous work on mate choice in which there can be a direct cost of  
203 mating with one category of individuals versus another<sup>54</sup>, in finding that costs can prevent  
204 mating preferences from evolving. In fact, all cases where there are direct viability or fecundity  
205 benefits to choosing one type of mate are also somewhat analogous. However, the costs of  
206 indiscriminate mating in the current model are much higher than in many other cases with direct  
207 benefits, as SSB results in a mating which cannot produce any offspring at all. The mechanisms  
208 operating here are most similar to the evolution of preferences for conspecifics, where mating  
209 with a heterospecific produces no viable hybrids. In both cases, costs of discrimination will trade  
210 off against the peril of producing no offspring. In the current context, the unexpected  
211 consequence is that SSB often results.

212         By showing that there are a broad range of conditions for which indiscriminate mating  
213 can be an optimal strategy, we extend recent work<sup>4</sup> suggesting the evolutionary origins of  
214 discriminate sexual behavior as a new and fruitful area of research. Our model provides an  
215 important proof-of-concept regarding whether indiscriminate mating can be an optimal  
216 evolutionary strategy and what conditions facilitate its evolution. One important result from this  
217 modeling exercise is that sexual discrimination can be favored by either low, intermediate, or  
218 high mortality rates depending on other features of the system (Table 3). As such, mortality rates  
219 alone are unlikely to predict whether indiscriminate mating is an optimal strategy. Costs to  
220 discrimination  $c$  and strengths of sexual signals  $s$  are more likely candidates for the drivers of  
221 indiscriminate mating, but their values in natural populations are unknown. Attempts to measure  
222 these (or related) parameters are important gaps to fill in determining whether SSB results from

223 selection for indiscriminate mating in nature. Specifically, our model leads to the predictions that  
224 species that mate indiscriminately have high costs to discrimination, search costs to survival  
225 rather than fecundity (since this results in more stringent conditions for sexual discrimination,  
226 Supplementary Appendix S3), and subtle differences between the sexes. In this way, our model  
227 suggests which features of organisms are likely to predispose them to indiscriminate mating,  
228 providing a guide future work to determine how widespread selection favoring indiscriminate  
229 mating is in nature

## 230 **References**

- 231 1. Bailey, N. W. & Zuk, M. Same-sex sexual behavior and evolution. *TREE* **24**, 439-446  
232 (2009).
- 233 2. Caballero-Mendieta, N. & Cordero, C. Enigmatic liaisons in Lepidoptera: a review of  
234 same-sex courtship and copulation in butterflies and moths. *J. Insect Sci.* **12**, 138 (2012).
- 235 3. Scharf, I. & Martin, O. Y. Same-sex sexual behavior in insects and arachnids: prevalence,  
236 causes, and consequences. *Behav. Ecol. Sociobiol.* **67**, 1719-1730 (2013).
- 237 4. Monk, J. D., Giglio, E., Kamath, A., Lambert, M. R., & McDonough, C. E. An  
238 alternative hypothesis for the evolution of same-sex sexual behavior in animals. *Nat.*  
239 *Ecol. Evol.* **3**, 1622-1631 (2019).
- 240 5. Vasey, P. L. Homosexual behavior in primates: A review of evidence and theory. *Int. J.*  
241 *Primatol.* **16**, 173-204 (1995).
- 242 6. Vasey, P. L. Same-sex sexual partner preference in hormonally and neurologically  
243 unmanipulated animals. *Annual Review of Sex Research* **13**, 141-179 (2002).
- 244 7. Vasey, P. L. & Jiskoot, H. The Biogeography and Evolution of Female Homosexual  
245 Behavior in Japanese Macaques. *Archives of Sexual Behavior* **39**, 1439-1441 (2010).
- 246 8. Furuichi, T., Connor, R. & Hashimoto, C. Non-conceptive sexual interactions in  
247 monkeys, apes, and dolphins. *Primates and Cetaceans*, 385-408 (Springer Tokyo,  
248 2013).
- 249 9. Sugita, N. Homosexual fellatio: Erect penis licking between male Bonin flying foxes  
250 *Pteropus pselaphon*. *PLoS One* **11**, e0166024 (2016).
- 251 10. Lombardo, M. P., Bosman, R. M., Faro, C. A., Houtteman, S. G. & Kluisza, T. S.  
252 Homosexual copulations by male tree swallows. *Wilson Ornithological Society* **106**, 555-  
253 557 (1994).
- 254 11. Zuk, M. Family values in black and white. *Nature* **439**, 917 (2006).
- 255 12. MacFarlane, G. R., Blomberg, S. P., Kaplan, G. & Rogers, L. J. Same-sex sexual  
256 behavior in birds: expression is related to social mating system and state of development  
257 at hatching. *Behav. Ecol.* **18**, 21-33 (2007).

- 258 13. Young, L. C., Zaun, B. J. & VanderWerf, E. A. Successful same-sex pairing in Laysan  
259 albatross. *Biol. Letters* **4**, 323-325 (2008).
- 260 14. MacFarlane, G. R., Blomberg, S. P. & Vasey, P. L. Homosexual behaviour in birds:  
261 frequency of expression is related to parental care disparity between the sexes. *Anim.*  
262 *Behav.* **80**, 375-390 (2010).
- 263 15. Harari, A. R., Brockmann, H. J. & Landolt, P. J. Intrasexual mounting in the beetle  
264 *Diaprepes abbreviatus* (L.). *PRSB* **267**, 2071-2079 (2000).
- 265 16. Van Gossum, H., De Bruyn, L. & Stoks, R. Reversible switches between male-male and  
266 male-female mating behaviour by male damselflies. *Biol. Letters* **1**, 268-270 (2005).
- 267 17. Bailey, N. W., Hoskins, J. L., Green, J. & Ritchie, M. G. Measuring same-sex sexual  
268 behaviour: the influence of the male social environment. *Anim. Behav.* **86**, 91-100 (2013).
- 269 18. Martin, F. M., Kruse, K. C. & Switzer, P. V. Social experience affects same-sex pairing  
270 behavior in male red flour beetles (*Tribolium castaneum* Herbst). *J. Insect Behav.* **28**,  
271 268-279 (2015).
- 272 19. Hoskins, J. L., Ritchie, M. G. & Bailey, N. W. A test of genetic models for the  
273 evolutionary maintenance of same-sex sexual behaviour. *PRSB* **282**, 20150429 (2015).
- 274 20. Ambrogio, O. V. & Pechenik, J. A. When is a male not a male? Sex recognition and  
275 choice in two sex-changing species. *Behav. Ecol. Sociobiol.* **62**, 1779-1786 (2008).
- 276 21. Hoving, H. J. T., Bush, S. L. & Robison, B. H. A shot in the dark: same-sex sexual  
277 behaviour in a deep-sea squid. *Biol. Letters* **8**, 287-290 (2011).
- 278 22. Hoving, H. J. T., Fernandez-Alvarez, F. A., Portner, R. J. & Gilly, W. F. Sex-sex sexual  
279 behaviour in an oceanic ommastrephid squid, *Dosidicus gigas* (Humboldt squid). *Mar.*  
280 *Biol.* **166**, 33 (2019).
- 281 23. Young, C. M., Tyler, P. A., Cameron, F. L. & Rumrill, S. G. Seasonal breeding  
282 aggregations in low-density population of the bathyal echinoid *Stylocidaris lineata*. *Mar.*  
283 *Biol.* **113**, 603-612 (1992).
- 284 24. McCarthy, D. A. & Young, C. M. Gametogenesis and reproductive behavior in the  
285 echinoid *Lytechinus variegatus*. *Mar. Ecol. Prog. Ser.* **233**, 157-168 (2002).
- 286 25. Keesing, J. K., Graham, F., Irvine, T. R. & Crossing, R. Synchronous aggregated pseudo-  
287 copulation of the sea star *Archaster angulatus* Muller and Troschel, 1842  
288 (Echinodermata: Asteroidea) and its reproductive cycle in south-western Australia. *Mar.*  
289 *Biol.* **158**, 1163-1173 (2011).
- 290 26. Werner, Y. L. Apparent homosexual behavior in an all-female population of a lizard,  
291 *Lepidodactylus lugubris* and its probable interpretation. *Ethol.* **54**, 144-150 (1980).
- 292 27. Kazmi, Q. B. & Tirmizi, N. M. An unusual behavior in box crabs (Decapoda, Brachyura,  
293 Calappidae). *Crustaceana* **53**, 313-314 (1987).
- 294 28. Nakashima, Y., Sakai, Y., Karino, K. & Kuwamura, T. Female-female spawning and sex  
295 change in a harem coral-reef fish, *Labroides dimidiatus*. *Zool. Sci.* **17**, 967-970 (2000).
- 296 29. Shine, R. *et al.* Movements, mating, and dispersal of red-sided gartersnakes (*Thamnophis*  
297 *sirtalis parietalis*) from a communal den in Manitoba. *Copeia* **1**, 82-91 (2001).
- 298 30. Marco, A. & Lizana, M. The absence of species and sex recognition during mate search  
299 by male common toads, *Bufo bufo*. *Ethol. Ecol. Evol.* **14**, 1-8 (2002).

- 300 31. Gavrillets, S. & Rice, W. R. Genetic models of homosexuality: generating testable  
301 predictions. *PRSB* **273**, 3031-3038 (2006).
- 302 32. Rice, W. R., Friberg, U. & Gavrillets, S. Homosexuality as a consequence of  
303 epigenetically canalized sexual development. *Q. Rev. Biol.* **87**, 343-368 (2012).
- 304 33. Dickins, T. E. & Rahman, Q. Ancestral primacy of same-sex sexual behavior does not  
305 explain its stable prevalence in modern populations. *Nat. Ecol. Evol.* **4**, 782-783 (2020).
- 306 34. Clive, J., Flintham, E. & Savolainen, V. Understanding same-sex sexual behaviour  
307 requires thorough testing rather than reinvention of theory. *Nat. Ecol. Evol.* **4**, 784-785  
308 (2020)
- 309 35. Spratt, E. C. Male homosexual behaviour and other factors influencing adult longevity in  
310 *Tribolium castaneum* (Herbst) and *T. confusum* Duval. *J. Stored Prod. Res.* **16**, 109-114  
311 (1980).
- 312 36. Maklakov, A. A. & Bonduriansky, R. Sex differences in survival costs of homosexual  
313 and heterosexual interactions: evidence from a fly and a beetle. *Anim. Behav.* **77**, 1375-  
314 1397 (2009).
- 315 37. Stojkovic, B., Jovanovic, D. S., Tucic, B. & Tucic, N. Homosexual behaviour and its  
316 longevity cost in females and males of the seed beetle *Acanthoscelides obtectus*. *Physiol.*  
317 *Entomol.* **35**, 308-316 (2010).
- 318 38. Doebeli, M., Ispolatov, Y. & Simon, B. Towards a mechanistic foundation of  
319 evolutionary theory. *eLife* **6**, e23804 (2017).
- 320 39. Bailey, N. W. & French, N. Same-sex sexual behaviour and mistaken identity in male  
321 field crickets, *Teleogryllus oceanicus*. *Anim. Behav.* **84**, 1031-1038 (2012).
- 322 40. Macchiano, A., Razik, I. & Sagot, M. Same-sex courtship behaviors in male-biased  
323 populations: evidence for the mistaken identity hypothesis. *Acta Ethol.* **21**, 147-151  
324 (2018).
- 325 41. Sales, K. *et al.* Experimental evolution with an insect model reveals that male  
326 homosexual behaviour occurs due to inaccurate mate choice. *Anim. Behav.* **139**, 51-59  
327 (2018).
- 328 42. Steiger, S. & Muller, J. K. From class-specific to individual discrimination: acceptance  
329 threshold changes with risk in the partner recognition system of the burying beetle  
330 *Nicophorus vespilloides*. *Anim. Behav.* **80**, 607-613 (2010).
- 331 43. Han, C. S. & Brooks, R. C. Same-sex sexual behaviour as a byproduct of reproductive  
332 strategy under male-male scramble competition. *Anim. Behav.* **108**, 193-197 (2015).
- 333 44. Engel, K. C., Manner, L., Ayasse, M. & Steiger, S. Acceptance threshold theory can  
334 explain occurrence of homosexual behaviour. *Biol. Letters* **11**, 20140603 (2015).
- 335 45. Reeve, H.K. The evolution of conspecific acceptance thresholds. *Am. Nat.* **133**, 407-435  
336 (1989).
- 337 46. Parker, G. A. The sexual cascade and the rise of pre-ejaculatory (Darwinian) sexual  
338 selection, sex roles, and sexual conflict. *Cold Spring Harb. Perspect. Biol.* **6**, a017509  
339 (2014).
- 340 47. Godin, J. J. & Briggs, S. E. Female mate choice under predation risk in the guppy. *Anim.*  
341 *Behav.* **51**, 117-130 (1996).

- 342 48. Byers, J. A., Byers, A. A. & Dunn, S. J. A dry summer diminishes mate search effort by  
343 pronghorn females: Evidence for a significant cost of mate search. *Ethol.* **112**, 74-80  
344 (2006).
- 345 49. Bluhm, B. A., Piepenburg, D. & von Jeterzenka, K. Distribution, standing stock, growth,  
346 mortality, and production of *Stronglyocentrotus pallidus* (Echinodermata: Echinoidea) in  
347 the northern Barents Sea. *Polar Biol.* **20**, 325-334 (1998).
- 348 50. Ebert, T. A., Russell, M. P., Gamba, G. & Badnar, A. Growth, survival, and longevity  
349 estimates for the rock-boring sea urchin *Echinometra lucunter lucenter* (Echinodermata,  
350 Echinoidea) in Bermuda. *Bull. Mar. Sci.* **82**, 381-403 (2008).
- 351 51. Miller, R. L. Evidence for the presence of sexual pheromones in free-spawning starfish.  
352 *J. Exp. Mar. Biol. Ecol.* **130**, 205-221 (1989).
- 353 52. Mercier, A. & Hamel, J. *Endogenous and Exogenous Control of Gametogenesis and*  
354 *Spawning in Echinoderms* Ch. 3: Spawning (Academic Press, 2009).
- 355 53. Slattery, M. & Bosch, I. Mating behavior of a brooding Antarctic asteroid *Neosmilaster*  
356 *georgianus*. *Invertebr. Reprod. Dev.* **24**, 97-102 (1993).
- 357 54. Bulmer, M. Structural instability of models of sexual selection. *Theor. Pop. Biol.* **35**, 195-  
358 208 (1989).

## 359 **Acknowledgements**

360 We thank Michael Moore and Max Lambert for comments on early versions of the manuscript  
361 and Aimee Deconinck for suggesting the name “targeted” sex.

## 362 **Author Contributions**

363 BAL conceived of the project and the optimization models. BAL and MRS designed the  
364 population genetic models. BAL led the writing on the manuscript with input from MRS.

## 365 **Data Availability**

366 All analyses can be reproduced by the files in the supplementary information.

## 367 **Competing Interests**

368 The authors declare no competing interests.

369 **Table 1.** Conditions for no discrimination or complete discrimination to be the optimal  
 370 evolutionary strategy given an equal sex ratio for each of the models we consider.

| <b>Discrimination cost to:</b>                    | <b>Presented in</b> | <b>Indiscriminate mating best strategy</b>          | <b>Complete sexual discrimination best strategy</b>                               |
|---------------------------------------------------|---------------------|-----------------------------------------------------|-----------------------------------------------------------------------------------|
| Survival (additive)                               | Main text           | $c > (1 - d)ds$                                     | $c < \frac{-(1 + 2ds) + \sqrt{1 + 4ds(1 + s)}}{2s}$                               |
| Survival (multiplicative)                         | Appendix S2         | $c > ds$                                            | $c < \frac{-(1 + 2ds) + \sqrt{1 + 4ds(1 + s)}}{2s(1 - d)}$                        |
| Fecundity                                         | Appendix S3         | $c > s(1 - ps)$                                     | $c < \frac{s(1 - ps)}{1 + 2s}$                                                    |
| Survival (additive) with semelparous life history | Appendix S4         | $c > (1 - d)s$                                      | $c < \frac{s(1 - d)}{1 + 2s}$                                                     |
| Survival (additive) with extra cost to SSB        | Appendix S1         | $c > s[d((1 - \delta) - d) + (1 - \delta/4)\delta]$ | $c < -(1 + 2ds + s\delta(1 - s))/2s + \sqrt{1 + 4ds(1 + s) + 2s\delta(1 + s)}/2s$ |

371

372



373 **Table 2.** Summary of parameters, their meaning, and their role in the evolution of sexual  
374 discrimination from the first model presented with discrimination as an additive cost to survival.

| <b>Parameter</b> | <b>Meaning</b>                                                     | <b>Range</b>          | <b>Effect</b>                                                                         |
|------------------|--------------------------------------------------------------------|-----------------------|---------------------------------------------------------------------------------------|
| <i>a</i>         | Attempt to mate discriminately                                     | $0 \leq a \leq 1$     | N/A                                                                                   |
| <i>c</i>         | Cost of mating discriminately                                      | $0 \leq c \leq (1-d)$ | Decreasing <i>c</i> favors sexual discrimination                                      |
| <i>s</i>         | Signal (by targeted sex) of their sexual identity                  | $0 \leq s \leq 1$     | Increasing <i>s</i> favors sexual discrimination                                      |
| $\sigma$         | Proportion of population of the targeted sex                       | $0 < \sigma < 1$      | Decreasing $\sigma$ favors sexual discrimination                                      |
| <i>p</i>         | Cost of presenting sexual identity (by targeted sex)               | $0 \leq p < 1$        | Increasing <i>p</i> decreases the selection gradient but has little effect on the ESS |
| <i>d</i>         | Baseline mortality probability between each reproductive bout      | $0 < d < 1$           | Intermediate values of <i>d</i> favor sexual discrimination                           |
| <i>f</i>         | Probability of finding any individual with which to attempt mating | $0 < f \leq 1$        | Increasing <i>f</i> increases the selection gradient but has little effect on the ESS |
| <i>r</i>         | Probability mate of correct sex rejects focal individual           | $0 \leq r < 1$        | Increasing <i>r</i> decreases the selection gradient but has little effect on the ESS |

375

376

377 **Table 3.** Summary of how key parameters qualitatively influence optimal sexual discrimination  
 378 in each model variant considered. The four distinct variants are shown as columns and are  
 379 presented in the location indicated by italics. The information in the table should be read as in the  
 380 following example. For the top left cell in the main body of the table: in the model variant where  
 381 there are additive survival costs to discrimination, high sexual discrimination evolves with a low  
 382 discrimination cost  $c$ .

| Parameter                    | In the model variant with...                    |                                                         |                                      |                                                   |
|------------------------------|-------------------------------------------------|---------------------------------------------------------|--------------------------------------|---------------------------------------------------|
|                              | Survival cost<br>(additive)<br><i>Main text</i> | Survival cost<br>(multiplicative)<br><i>Appendix S2</i> | Fecundity cost<br><i>Appendix S3</i> | Semelparous life<br>history<br><i>Appendix S4</i> |
|                              | High sexual discrimination evolves with...      |                                                         |                                      |                                                   |
| Discrimination cost $c$      | Low                                             | Low                                                     | Low                                  | Low                                               |
| Sexual signal $s$            | High                                            | High                                                    | High                                 | High                                              |
| Proportion targeted $\sigma$ | Low                                             | Low                                                     | Low                                  | Low                                               |
| Signaling cost $p$           | No effect                                       | No effect                                               | Low                                  | No effect                                         |
| Mortality $d$                | Intermediate                                    | High                                                    | No effect                            | Low                                               |

383

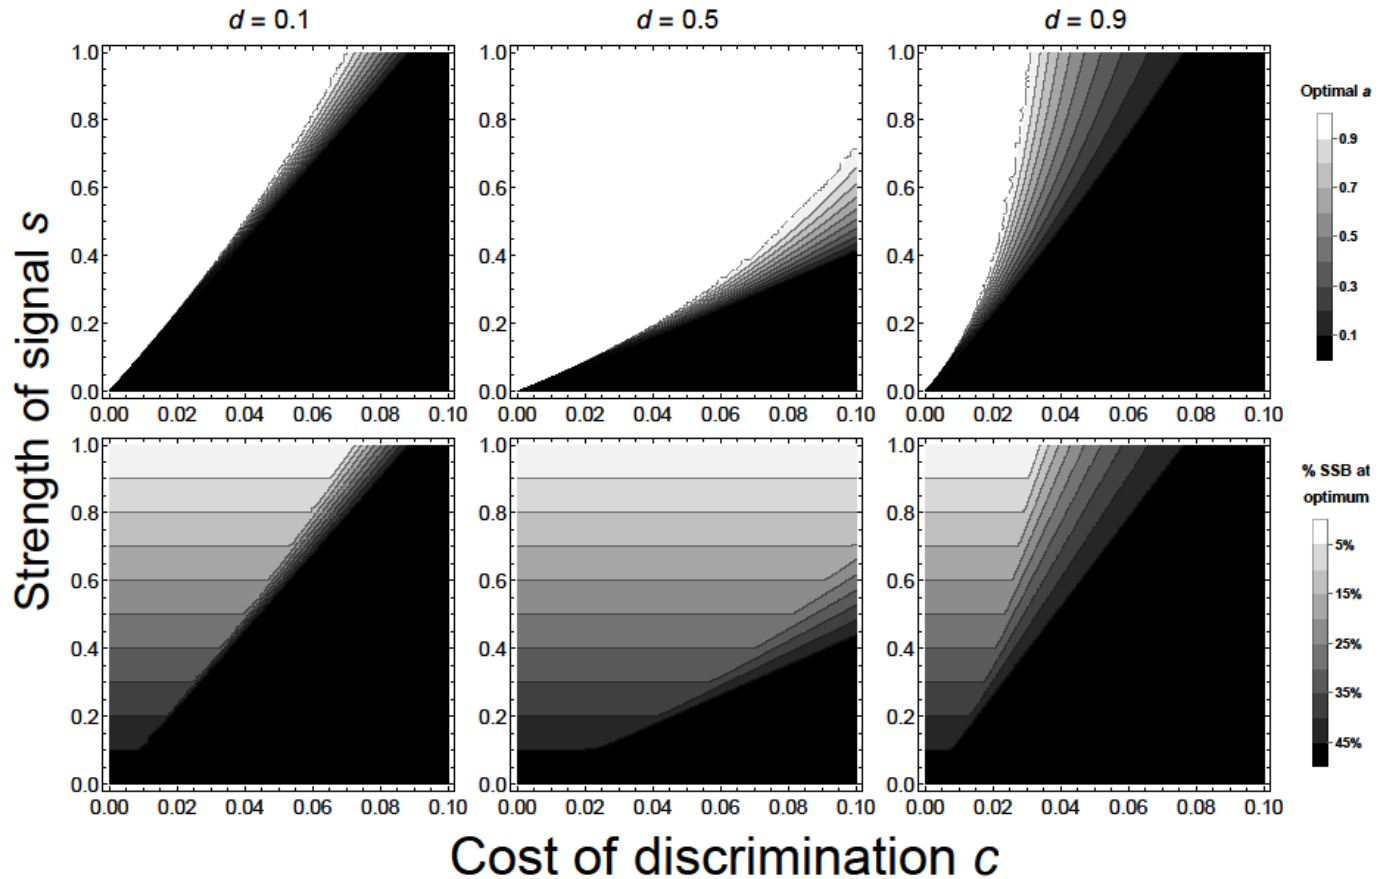

384

385 **Fig. 1.** Top row: Optimal discrimination strategies  $a$  predicted by the optimization model with  
386 cost to discrimination  $c$  on the x-axis, strength of sexual signal  $s$  on the y-axis, and death rate  $d$   
387 increasing across columns from left to right. Higher levels of attempted discrimination  
388 correspond to lighter shading (white:  $a = 1$ ; black  $a = 0$ ). A wide range of parameter values  
389 predict that indiscriminate mating (black) is the best strategy. Indiscriminate mating is favored  
390 by increasing the cost of discrimination  $c$  and decreasing the strength of the sexual signal  $s$ .  
391 Bottom row: proportion of matings expected to be SSB at the evolutionary optimum. Darker  
392 values indicate more same-sex matings (black: half of matings are with individuals of the same  
393 sex at the optimum; white: no matings are with individuals of the same sex if behaving  
394 optimally). Other parameters: proportion of the population of the targeted sex  $\sigma = 0.5$ ,  
395 probability of finding any individual with which to attempt to mate  $f = 1$ , probability of being  
396 rejected by a potential mate  $r = 0$ , cost of sexual signal  $p = 0$ .

397
